# Supplementary material
Source: publisher site journal article supplement (https://www.spandidos-publications.com/5568/downloadSupplementary)

Figure S1. TTC induces apoptosis in macrophages. RAW 264.7 and BV2 cells were treated with TTC under indicated concentrations for 24 h. (A and B) Caspase-3 and  $\beta$ -actin as an internal control were analyzed by western blotting in (A) RAW 264.7 and (B) BV2 cells.

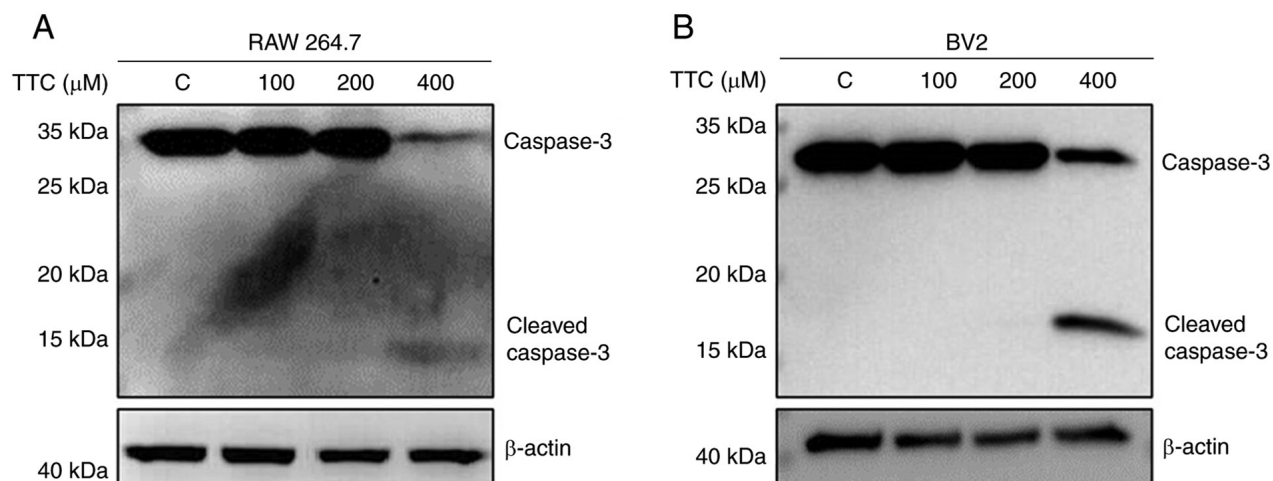

Supplement: Supplementary file 1 [file downloadSupplementary]
